# Supplementary material for: Assessing global water mass transfers from continents to oceans over the period 1948–2016
Source: Copernicus journal article supplement (doi:10.5194/hess-2019-664), 2020-02-06
Supplement: Supplementary file 1 [file hess-2019-664-supplement.pdf]

## S1. Glacier data integration and evaluation of global glacier model

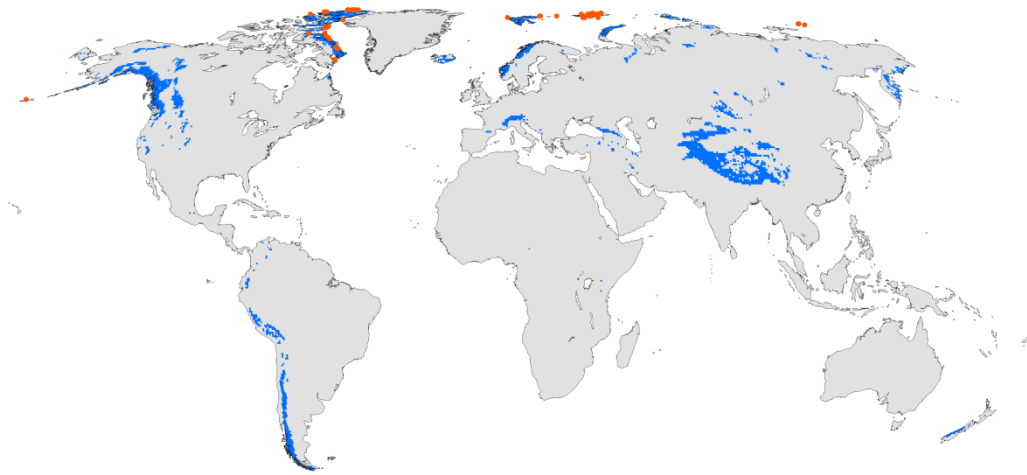

**Figure S1:** Location of glacierized grid cells (from GGM gridded data) within (blue cells) and outside (orange dots) of the boundaries of the WATCH-CRU land-sea mask (used by WaterGAP).

5

10

15

20

**Table S1:** List of individual glaciers considered for the comparison between observed and simulated glacier seasonal mass change. Observational data was obtained from the World Glacier Monitoring Service (2017). Modelled data was obtained with the global glacier model of Marzeion et al. (2012). NSE; Nash–Sutcliffe efficiency, r; correlation coefficient.

| Glacier name<br>(RGI region)                         | Number<br>of years<br>with obs. | Area<br>(km <sup>2</sup> ,<br>1950) | r    | NSE   | Glacier name<br>(RGI region)           | Number<br>of years<br>with obs. | Area<br>(km <sup>2</sup> ,<br>1950) | r    | NSE   |
|------------------------------------------------------|---------------------------------|-------------------------------------|------|-------|----------------------------------------|---------------------------------|-------------------------------------|------|-------|
| Gulkana (Alaska)                                     | 49                              | 17.57                               | 0.97 | 0.23  | Storglaciaeren<br>(Scandinavia)        | 71                              | 3.16                                | 0.94 | 0.68  |
| Wolverine (Alaska)                                   | 49                              | 0.03                                | 0.97 | 0.86  | Engabreen<br>(Scandinavia)             | 46                              | 42.95                               | 0.98 | 0.93  |
| Melville South Ice Cap<br>(Western Canada and<br>US) | 39                              | 1.24                                | 0.9  | 0.77  | Aalfotbreen<br>(Scandinavia)           | 53                              | 4.86                                | 0.99 | 0.97  |
| Helm (Western Canada<br>and US)                      | 13                              | 0.98                                | 0.99 | 0.91  | Vodopadnyy (North<br>Asia)             | 28                              | 0.76                                | 0.9  | 0.8   |
| Place (Western Canada<br>and US)                     | 24                              | 3.02                                | 0.99 | 0.98  | Maliy Aktru (North<br>Asia)            | 44                              | 2.62                                | 0.89 | 0.57  |
| Peyto (Western Canada<br>and US)                     | 27                              | 9.7                                 | 0.97 | 0.72  | Leviy Aktru (North<br>Asia)            | 23                              | 5.67                                | 0.95 | 0.68  |
| South Cascade<br>(Western Canada and<br>US)          | 51                              | 3.55                                | 0.99 | 0.97  | Careser (Central<br>Europe)            | 16                              | 2.84                                | 0.97 | 0.91  |
| Devon Ice Cap NW<br>(Arctic Canada North)            | 54                              | 765.44                              | 0.94 | -0.68 | Gries (Central<br>Europe)              | 55                              | 5.29                                | 0.98 | 0.84  |
| Meighen Ice Cap<br>(Arctic Canada North)             | 49                              | 92.93                               | 0.88 | 0.73  | Sarennes (Central<br>Europe)           | 68                              | 0.44                                | 0.96 | 0.85  |
| Midtre Lovénbreen<br>(Svalbard)                      | 38                              | 5.21                                | 0.96 | 0.9   | Vernagtferner<br>(Central Europe)      | 50                              | 8.56                                | 0.96 | -1.23 |
| Austre Broeggerbreen<br>(Svalbard)                   | 38                              | 9.81                                | 0.96 | 0.9   | Silvretta (Central<br>Europe)          | 57                              | 2.88                                | 0.97 | 0.92  |
| Rembesdalskaaka<br>(Scandinavia)                     | 53                              | 16.83                               | 0.97 | 0.88  | Hintereis F. (Central<br>Europe)       | 6                               | 8.04                                | 0.99 | 0.94  |
| Storbreen (Scandinavia)                              | 67                              | 5.21                                | 0.98 | 0.97  | Djankuat (Caucasus<br>and Middle East) | 47                              | 1.76                                | 0.99 | 0.85  |
| Graasubreen<br>(Scandinavia)                         | 54                              | 2                                   | 0.96 | 0.48  | TS. Tuyuksuyskiy<br>(Central Asia)     | 50                              | 2.84                                | 0.93 | 0.52  |
| Hellstugubreen<br>(Scandinavia)                      | 54                              | 3.28                                | 0.98 | 0.94  | Echaurren Norte<br>(Southern Andes)    | 41                              | 0.34                                | 0.96 | 0.71  |
| Nigardsbreen<br>(Scandinavia)                        | 54                              | 38.1                                | 0.97 | 0.91  |                                        |                                 |                                     |      |       |

## S2. Comparison of observed and simulated global TWSA during the period January 2003 to August 2016

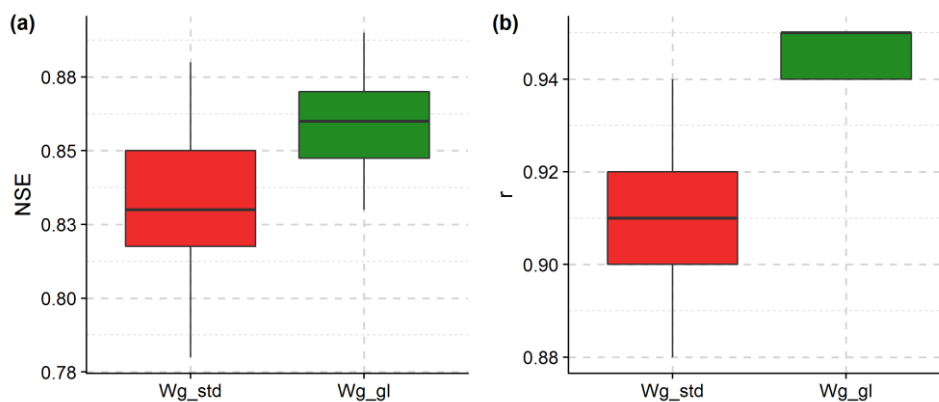

30 **Figure S2:** Nash-Sutcliffe efficiency NSE (a) and correlation coefficient  $r$  (b) obtained by comparing global monthly TWSA from  
 GRACE observations and from two versions of WaterGAP2.2d, January 2003 to August 2016. Four GRACE-based TWSA time series  
 were compared to four TWSA time series computed by standard WaterGAP (Wg\_std) in anthropogenic mode (Wg\_std\_ant\_CRU\_irr100,  
 Wg\_std\_ant\_CRU\_irr70, Wg\_std\_ant\_GPCC\_irr100 and Wg\_std\_ant\_GPCC\_irr70 in Table 1) and to four TWSA time series computed  
 by integrated WaterGAP (Wg\_gl) in anthropogenic mode (Wg\_gl\_ant\_CRU\_irr100, Wg\_gl\_ant\_CRU\_irr70, Wg\_gl\_ant\_GPCC\_irr100  
 35 and Wg\_gl\_ant\_GPCC\_irr70 in Table 1).

## S3. Global water transfer from continents to oceans over the period 1948-2016

**Table S2:** Linear trends of contribution of TWSA to OMC over three periods (1948-1975, 1976-2002 and 2003-2016). Estimates were  
 obtained with four variants of integrated WaterGAP (same variants as in Figure 5a). Trends were calculated according to the least squares  
 regression method. Positive trends translate to ocean mass gain, whereas negative trends translate to ocean mass loss. Millimetres of sea  
 40 level equivalent (mm SLE) are relative to the global ocean area ( $361.0 \cdot 10^6 \text{ km}^2$ ).

| Model variant     | Linear trend<br>mm SLE yr <sup>-1</sup> |           |           |
|-------------------|-----------------------------------------|-----------|-----------|
|                   | 1948-1975                               | 1976-2002 | 2003-2016 |
| Wg_gl_GPCC_irr70  | 0.18                                    | 0.57      | 1.06      |
| Wg_gl_GPCC_irr100 | 0.23                                    | 0.66      | 1.19      |
| Wg_gl_CRU_irr70   | 0.13                                    | 0.49      | 1.18      |
| Wg_gl_CRU_irr100  | 0.17                                    | 0.58      | 1.30      |

## References

- 45 Marzeion, B.; Jarosch, A. H.; Hofer, M. (2012): Past and future sea-level change from the surface mass balance of glaciers. In *The Cryosphere* 6 (6), pp. 1295–1322. DOI: 10.5194/tc-6-1295-2012.
- World Glacier Monitoring Service (2017): Fluctuations of Glaciers Database.
